# Supplementary material for: Antioxidants in non-perfluorinated fuel cell membranes: prospects and limitations
Source: Royal Society of Chemistry journal article supplement (doi:10.1039/c4ra09792k), 2014-10-08
Supplement: c4ra09792k1.pdf [file c4ra09792k1.pdf]

## Supplementary Data

### Antioxidants in Non-Perfluorinated Fuel Cell Membranes: Prospects and Limitations

Yves Buchmüller, Zhuoxiang Zhang, Alexander Wokaun, Lorenz Gubler  
Electrochemistry Laboratory, Paul Scherrer Institut, 5232 Villigen PSI, Switzerland

#### *Post-Test Analysis of Tested Membranes*

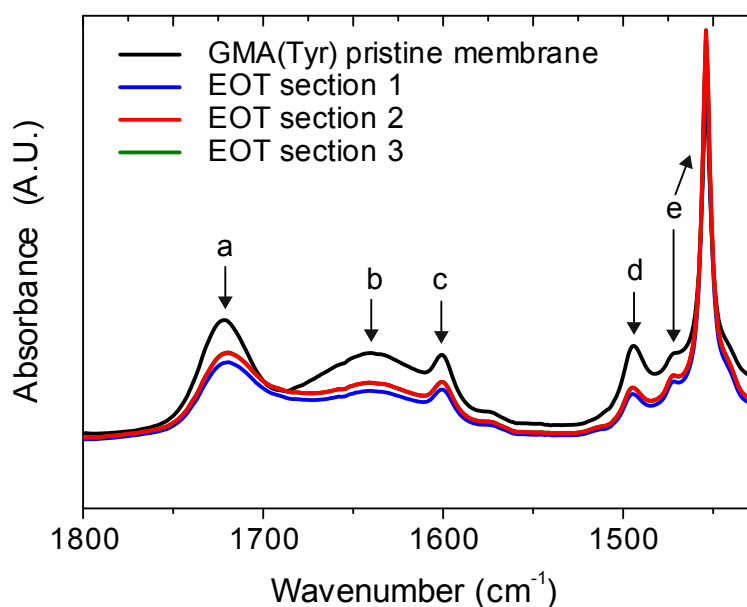

Figure S1: FTIR spectra of GMA(Tyr) “fresh” membrane of an IEC of 1.7 mmol/g before (pristine) and after (EOT = end of test) accelerated stress test of 144 h at OCV, H<sub>2</sub>/O<sub>2</sub> (fully humidified), cell temperature 80°C, and backpressure 2.5 bar<sub>a</sub>. The active area was cut into three pieces (EOT 1 to 3). Assignment of bands: a) C=O stretch of ester, b) H<sub>2</sub>O bending, c) and d) aromatic C-C stretch, e) ETFE (base film) relevant vibration.
